# Supplementary material for: A novel human in vitro papillomavirus type 16 positive tonsil cancer cell line with high sensitivity to radiation and cisplatin
Source: Springer Nature journal article supplement (doi:10.1186/s12885-019-5469-8), 2019-03-25
Supplement: MOESM1 [file 16574638]

## LU-HNSCC-26

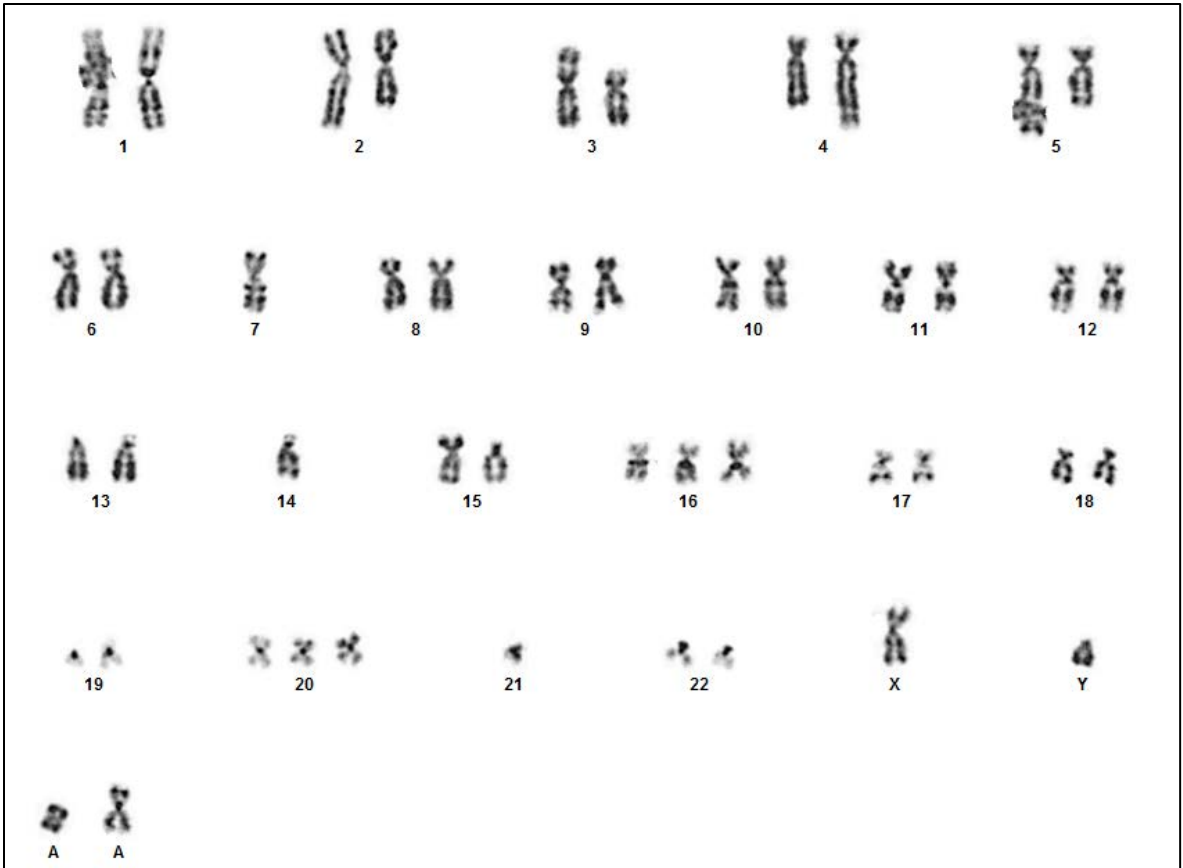

47,XY,del(2)(q33),del(3)(p21),der(4)t(4;5)(q35;q31),add(5)(q35),-7,-14,add(15p11),?i(16)(q10),-21,+mar[cp6]/44-47,idem,i(8)(q10)[cp3]
