# Supplementary material for: A novel human in vitro papillomavirus type 16 positive tonsil cancer cell line with high sensitivity to radiation and cisplatin
Source: Springer Nature journal article supplement (doi:10.1186/s12885-019-5469-8), 2019-03-25

### chr17:7579472G>C (rs1042522)

```
0000201  tggtaggttttctgggaagggacagaagatgacaggggcccaggagggggc 0000250  
>>>>>>  |||  >>>>>>  
7579376  tggtaggttttctgggaagggacagaagatgacaggggcccaggagggggc 7579425  
  
0000251  tggtaggttttctgggaagggacagaagatgacaggggcccaggagggggc 0000300  
>>>>>>  |||  >>>>>>  
7579426  tggtaggttttctgggaagggacagaagatgacaggggcccaggagggggc 7579475  
  
0000301  gagcagcctctggcattctgggagcttcatctggacctgggtcttcagtg 0000350  
>>>>>>  |||  >>>>>>  
7579476  gagcagcctctggcattctgggagcttcatctggacctgggtcttcagtg 7579525
```

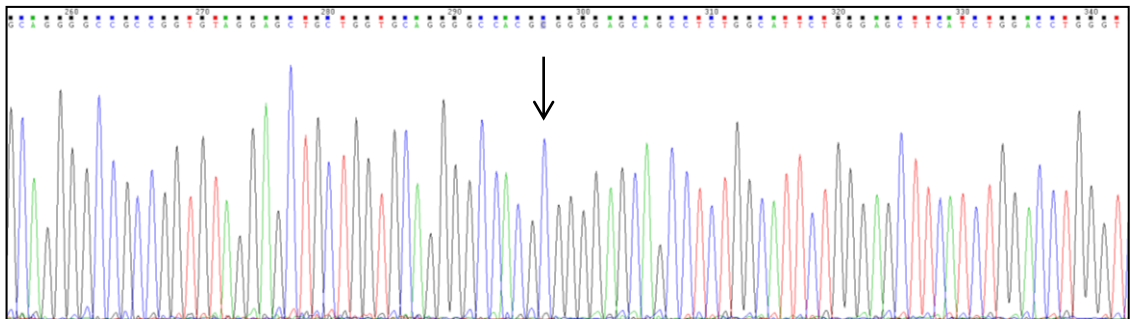

Supplement: MOESM2 [file 16574638]
